# Supplementary material for: Survival prediction of stage I lung adenocarcinomas by expression of 10 genes
Source: JCI journal article supplement (doi:10.1172/jci32007), 2007-10-19

## SUPPLEMENTAL INFORMATION

### LEGENDS TO SUPPLEMENTAL FIGURES

**Supplemental Figure 1. Performance of the 49-gene model.** These data are supplemental to those shown in Fig. 2 of the main text. In **A**, the 49-gene model was used to predict overall survival in lung adenocarcinoma patients of the Harvard and Michigan cohorts, as shown. Patients were divided according to tumor stage, and Kaplan-Meier analyses are shown for Stage I patients (as in Fig. 2 of the main text), Stage II-III patients, and for the entire cohort (Stage I-II-III). As shown, the 49-gene model had no predictive power in Stage II-III adenocarcinomas. In **B**, the performance of the 49-gene model in the prediction, by Kaplan-Meier analysis, of overall patient survival in the Duke cohort is compared to that of the 50- and 100-gene signatures of Beer *et al.* (ref. 9 in the main text). Red, favorable signature; Green, unfavorable signature.

**Supplemental Figure 2. Performance of the 10-gene model on the Michigan and Harvard cohorts.** These data are supplemental to those shown in Fig. 4A of the main text. The 10-gene signature was used to predict overall patient survival within the Michigan and Harvard cohorts. In the case of the Michigan cohort, 7 genes could be used (*SF3B1*, *NUDCD1* and *SCGB3A1* were not present on HU6800 microarray, used in that study), in the case of the Harvard cohort, 8 genes could be used (*NUDCD1* and *SCGB3A1* were not present on HU95av2 microarray used in that study). Patients from the two cohorts were grouped according to tumor stage, as described in Supplemental Fig. 1. Remarkably, despite the reduction in the number of genes utilizable, the

signature could still predict overall survival in patients with Stage I disease. The prediction in the Duke cohort (all 10 genes could be used in this case) is the same as in Fig. 4A of the main text, and is reported for comparison.

**Supplemental Figure 3. Survival analysis of stage IA and stage IB adenocarcinoma patients.**

**A.** The 10-gene model was tested to predict overall survival in the IFOM cohort of Stage IA (as reported also in Fig. 4B) and Stage IB lung adenocarcinomas. Data are shown, in a Kaplan-Meier plot, as the probability of survival as a function of a “favorable” (red line), or “unfavorable” (green line) signature.

**B.** The IFOM and Duke cohorts of stage I adenocarcinoma patients were stratified accordingly to the tumor stage. Data are shown, in a Kaplan-Meier plot, as the probability of survival as a function of a “stage IA” (red line), or “stage IB” (green line) parameter.

## SUPPLEMENTAL TABLES

**Supplemental Table 1. Clinicopathological data for the various patient groups used in this study.**

|                                      | Michigan cohort<br>(N=41) | Harvard cohort<br>(N=60) | Duke cohort<br>(N=34) | IFOM Train. cohort<br>(N=25) | IFOM Val. cohort<br>(N=45) |
|--------------------------------------|---------------------------|--------------------------|-----------------------|------------------------------|----------------------------|
| <b>Age - Years</b>                   |                           |                          |                       |                              |                            |
| Median                               | 60                        | 61                       | 66                    | 64                           | 64                         |
| Range                                | 41-80                     | 33-88                    | 43-83                 | 51-72                        | 48-81                      |
| Mean±SD                              | 61±10                     | 62±11                    | 65±9                  | 63±6                         | 64±9                       |
| <b>Sex - No(%)</b>                   |                           |                          |                       |                              |                            |
| Male                                 | 16 (39)                   | 26 (43)                  | 17 (50)               | 23 (92)                      | 41 (91)                    |
| Female                               | 25 (61)                   | 34 (57)                  | 17 (50)               | 2 (8)                        | 4 (9)                      |
| <b>Smoking (pack year) - No. (%)</b> |                           |                          |                       |                              |                            |
| None                                 | 3 (7)                     | 3 (5)                    |                       |                              |                            |
| ≤20 Yr                               | 5 (12)                    | 10 (17)                  |                       |                              |                            |
| 21-49 Yr                             | 13 (32)                   | 20 (33)                  |                       |                              |                            |
| ≥50 Yr                               | 17 (41)                   | 27 (45)                  |                       |                              |                            |
| N.R                                  | 3 (7)                     |                          |                       |                              |                            |
| <b>Stage - No. (%)</b>               |                           |                          |                       |                              |                            |
| I*                                   |                           | 1 (2)                    | 4 (12)                |                              |                            |
| IA                                   | 16 (39)                   | 15 (25)                  | 21 (62)               | 8 (32)                       | 13 (29)                    |
| IB                                   | 12 (29)                   | 28 (46)                  | 9 (26)                | 17 (68)                      | 32 (71)                    |
| IIA                                  |                           | 2 (3)                    |                       |                              |                            |
| IIB                                  |                           | 8 (13)                   |                       |                              |                            |
| IIIA                                 | 13 (32)                   | 4 (7)                    |                       |                              |                            |
| IIIB                                 |                           | 2 (3)                    |                       |                              |                            |
| <b>Tumor stage - No. (%)</b>         |                           |                          |                       |                              |                            |
| 1                                    | 20 (49)                   | 19 (32)                  | 21 (62)               | 8 (32)                       | 13 (29)                    |
| 2                                    | 16 (39)                   | 35 (58)                  | 9 (26)                | 17 (68)                      | 32 (71)                    |
| 3                                    | 5 (12)                    | 3 (5)                    |                       |                              |                            |
| 4                                    |                           | 2 (3)                    |                       |                              |                            |
| N.A.                                 |                           | 1 (2)                    | 4 (12)                |                              |                            |
| <b>Nodal status - No. (%)</b>        |                           |                          |                       |                              |                            |
| Negative                             | 28 (68)                   | 36 (60)                  |                       |                              |                            |
| Positive                             | 13 (32)                   | 12 (20)                  |                       |                              |                            |
| N.A.                                 |                           | 12 (20)                  |                       |                              |                            |

**Legend to Supplemental Table 1.** Data are reported for the patients included in the reduced datasets of the Michigan and Harvard cohorts, and for all patients of the other cohorts.

\*, Tumor stage (A or B) was not available; N.A., not available

**Supplemental Table 2. Prognostic predictive accuracy of the 49-gene model.**

| Reduced Datasets |                        |                 |                 |                       |                 |                 |
|------------------|------------------------|-----------------|-----------------|-----------------------|-----------------|-----------------|
|                  | Michigan cohort N = 41 |                 |                 | Harvard cohort N = 60 |                 |                 |
| Model            | Accuracy (%)           | Sensitivity (%) | Specificity (%) | Accuracy (%)          | Sensitivity (%) | Specificity (%) |
| 49-gene          | 90                     | 89              | 91              | 72                    | 67              | 76              |
| 50-gene          | 73                     | 50              | 91              | 63                    | 67              | 61              |
| 100-gene         | 80                     | 72              | 87              | 63                    | 59              | 67              |
| 71-gene          | 85                     | 83              | 87              | 73                    | 67              | 79              |

| Original datasets |                        |          |           |                       |          |           |                    |          |           |
|-------------------|------------------------|----------|-----------|-----------------------|----------|-----------|--------------------|----------|-----------|
|                   | Michigan cohort N = 86 |          |           | Harvard cohort N = 84 |          |           | Duke cohort N = 34 |          |           |
| Model             | Acc. (%)               | Sen. (%) | Spec. (%) | Acc. (%)              | Sen. (%) | Spec. (%) | Acc. (%)           | Sen. (%) | Spec. (%) |
| 49-gene           | 69                     | 67       | 69        | 71                    | 71       | 72        | 82                 | 93       | 74        |
| 50-gene           | 81                     | 58       | 90        | 60                    | 60       | 58        | 74                 | 80       | 69        |
| 100-gene          | 81                     | 75       | 84        | 58                    | 63       | 53        | 76                 | 80       | 74        |
| 71-gene           | 73                     | 67       | 76        | 69                    | 69       | 69        | 82                 | 93       | 74        |

| Modified Reduced Datasets |                        |                 |                 |                       |                 |                 |
|---------------------------|------------------------|-----------------|-----------------|-----------------------|-----------------|-----------------|
|                           | Michigan cohort N = 66 |                 |                 | Harvard cohort N = 61 |                 |                 |
| Model                     | Accuracy (%)           | Sensitivity (%) | Specificity (%) | Accuracy (%)          | Sensitivity (%) | Specificity (%) |
| 49-gene                   | 79                     | 83              | 77              | 74                    | 70              | 77              |
| 50-gene                   | 85                     | 56              | 96              | 67                    | 67              | 68              |
| 100-gene                  | 83                     | 72              | 88              | 64                    | 56              | 71              |
| 71-gene                   | 85                     | 83              | 85              | 74                    | 67              | 79              |

**Legend to Supplemental Table 2.** The 49-gene model was tested for prognostic predictive accuracy by leave-one-out cross-validation. Two other models of 50 and 100 genes, respectively, from Beer *et al.* (ref. 9 in the main text) were tested, as a comparison. Models were tested on the reduced datasets (top panel), and on the original datasets (middle panel) from the Michigan, Harvard, and Duke cohorts (N, number of patients in the dataset).

An additional control was also performed, to ensure that criteria used for the cut-offs did not introduce biases in the analysis and/or somehow led to overfitting of the data. To do this, we changed the cut-off criteria to define the good and poor prognosis groups. The new criteria used were: poor prognosis = death event in < 30 months; good prognosis = alive >15 months (in both cohorts of patients). With these new criteria, we obtained what are defined as “modified reduced datasets” (bottom panels). These datasets included more patients than the “reduced datasets” (a total of 69 patients are excluded from the reduced datasets, while only 43 patients are excluded from the modified reduced datasets). The “modified reduced datasets” were subjected to meta-analysis (as described in Methods). This led to the identification of a 71-gene prognostic signature (which shares 23 genes with the 49-gene signature). The performance of the 71-gene model in the leave-one-out cross-validation is shown

here, in comparison to the 49-gene model and to the 50- and 100-gene models from Beer *et al.*, for the modified reduced datasets, the reduced datasets, and the original datasets. As shown, the 71-gene model did not perform better than the 49-gene model, despite containing 22 additional genes.

**Supplemental Table 3. Differential expression of genes of the 28-gene biased signature in Stage I lung adenocarcinomas.**

| Gene                  | Probe set   | FOLD tumor/normal | p-value |
|-----------------------|-------------|-------------------|---------|
| <b>Michigan study</b> |             |                   |         |
| NASP                  | m97856_at   | 1.33              | 0.0105  |
| RRM2                  | x59618_at   | 4.93              | 0.0032  |
| E2F1                  | s49592_s_at | 1.57              | <0.0001 |
| MCM4                  | x74794_at   | 2.11              | <0.0001 |
| <b>Harvard study</b>  |             |                   |         |
| NASP                  | 33255_at    | 1.37              | 0.0412  |
| G3BP2                 | 35793_at    | 1.20              | 0.0185  |
| SF3BP1                | 39444_at    | 2.02              | 0.0097  |
| MCM4                  | 981_at      | 3.96              | 0.0003  |
| CCNE2                 | 35249_at    | 3.87              | 0.0002  |
| RRM2                  | 36922_at    | 4.17              | <0.0001 |
| MCM6                  | 40117_at    | 1.89              | <0.0001 |

| Gene                 | Probe set    | FOLD poor/good | p-value |
|----------------------|--------------|----------------|---------|
| <b>Harvard study</b> |              |                |         |
| MCM6                 | 40117_at     | 1.44           | 0.0011  |
| MCM7                 | 947_at       | 1.38           | 0.0080  |
| <b>Duke study</b>    |              |                |         |
| USP37                | 226729_at    | 1.72           | 0.0012  |
| RRM2                 | 201890_at    | 2.13           | 0.0028  |
| FLJ37562             | 1553108_at   | 1.97           | 0.0032  |
| MCM7                 | 210983_s_at  | 1.93           | 0.0071  |
| MCM4                 | 222036_s_at  | 2.63           | 0.0076  |
| G3BP2                | 208841_s_at  | 1.39           | 0.0160  |
| SF3B1                | 201071_x_at  | 1.26           | 0.0172  |
| FAM91A1              | 226294_x_at  | 1.43           | 0.0187  |
| UHRF1                | 225655_at    | 1.95           | 0.0216  |
| HAT1                 | 203138_at    | 1.79           | 0.0227  |
| TRPC4AP              | 212059_s_at  | 1.25           | 0.0277  |
| C3orf4               | 239146_at    | 0.73           | 0.0351  |
| SYNCRIP              | 217832_at    | 1.33           | 0.0352  |
| CKAP5                | 1555278_a_at | 1.44           | 0.0374  |
| SCC-112              | 212138_at    | 1.28           | 0.0428  |

**Legend to Supplemental Table 3.** These data are supplemental to those shown in Fig. 3A of the main text.

Since datasets from the Michigan, Harvard and Duke studies were obtained on different generations of chips, not all of the 28 genes of the biased signature were present on the chips. In particular, only 5 and 11 genes of 28 were present on the chips used in the Michigan and Harvard studies, respectively. This prevented Kaplan-Meier analysis on the Michigan and Harvard cohorts, which, on the other hand, could

be meaningfully performed on the Duke cohorts, since all the 28 genes were present in the datasets (see Fig. 3A).

However, as shown in this Table (top), 4 of 5 genes, and 7 of 11 genes, were significantly overexpressed in tumor vs. normal tissues in the Michigan and Harvard study, respectively (it was not possible to perform the same analysis on the Duke datasets since no information were present as to expression levels in normal lungs).

In addition (bottom part of the Table), in the Harvard cohort, 2 of 11 genes were significantly regulated in the comparison between good and poor prognosis patients. No significant regulation was found in the 5 genes present in the Stage I lung adenocarcinomas in the Michigan cohort, whereas, in the Duke cohort 15 of 28 genes were significantly regulated in the unfavorable prognosis vs. the good prognosis group.

**Supplemental Table 4. Analysis of the 80-gene model in the Duke cohort and in the IFOM training cohort.**

| Gene     | Source | Duke cohort |         | IFOM training cohort (Q-PCR) |      |         |
|----------|--------|-------------|---------|------------------------------|------|---------|
|          |        | FOLD        | p-value | Tested                       | FOLD | p-value |
| SCGB3A1* | Liter. | 0.48        | 0.314   | YES                          | 0.03 | <0.001  |
| EIF3S6   | Liter. | 1.28        | 0.087   | YES                          | 1.38 | 0.425   |
| TERT     | Liter. | 1.31        | 0.126   | YES                          | ND   | ND      |
| BAT1     | E1A    | 1.26        | 0.085   |                              |      |         |
| C3orf4   | E1A    | 0.73        | 0.035   |                              |      |         |
| CCNE1    | E1A    | 1.24        | 0.432   | YES                          | 0.94 | 0.840   |
| CCNE2    | E1A    | 1.13        | 0.590   | YES                          | 0.78 | 0.543   |
| CKAP5    | E1A    | 1.44        | 0.037   | YES                          | 1.03 | 0.988   |
| DEPDC1B  | E1A    | 0.74        | 0.173   |                              |      |         |
| E2F1*    | E1A    | 1.17        | 0.288   | YES                          | 1.79 | 0.012   |
| FAM91A1  | E1A    | 1.43        | 0.019   | YES                          | 1.13 | 0.736   |
| FLJ37562 | E1A    | 1.97        | 0.003   |                              |      |         |
| G3BP2    | E1A    | 1.39        | 0.016   |                              |      |         |
| HAT1     | E1A    | 1.79        | 0.023   |                              |      |         |
| LBR      | E1A    | 1.36        | 0.143   |                              |      |         |
| MCM4*    | E1A    | 2.63        | 0.008   | YES                          | 1.51 | 0.317   |
| MCM6*    | E1A    | 1.45        | 0.058   | YES                          | 2.07 | 0.022   |
| MCM7*    | E1A    | 1.93        | 0.007   | YES                          | 1.62 | 0.138   |
| NASP     | E1A    | 1.37        | 0.073   | YES                          | 1.19 | 0.071   |
| NUDCD1*  | E1A    | 1.36        | 0.082   | YES                          | 1.88 | 0.001   |
| PHOSPHO2 | E1A    | 1.37        | 0.093   |                              |      |         |
| PTBP2    | E1A    | 0.90        | 0.521   |                              |      |         |
| RRM2*    | E1A    | 2.13        | 0.003   | YES                          | 5.29 | 0.049   |
| SCC-112  | E1A    | 1.28        | 0.043   |                              |      |         |
| SF3B1*   | E1A    | 1.26        | 0.017   | YES                          | 1.14 | 0.033   |
| SMU1     | E1A    | 1.23        | 0.309   | YES                          | 1.25 | 0.863   |
| SYNCRIP  | E1A    | 1.33        | 0.035   |                              |      |         |
| TAF3     | E1A    | 0.74        | 0.224   |                              |      |         |
| TRPC4AP  | E1A    | 1.25        | 0.028   | YES                          | 1.08 | 0.194   |
| UHRF1    | E1A    | 1.95        | 0.022   |                              |      |         |
| USP37    | E1A    | 1.72        | 0.001   |                              |      |         |
| ARL4A    | Meta.  | 2.16        | 0.002   |                              |      |         |
| ATP13A3  | Meta.  | 1.37        | 0.067   | YES                          | 1.12 | 0.164   |
| LU       | Meta.  | 1.22        | 0.288   | YES                          | 0.81 | 0.316   |
| BFSP1    | Meta.  | 1.27        | 0.378   | YES                          | 1.05 | 0.780   |
| CTF1     | Meta.  | 1.45        | 0.093   | YES                          | 0.75 | 0.663   |
| CXCL6*   | Meta.  | 1.26        | 0.332   | YES                          | 2.88 | 0.424   |
| PSF1     | Meta.  | 0.82        | 0.445   | YES                          | 1.36 | 0.234   |
| E2F4*    | Meta.  | 1.05        | 0.335   | YES                          | 1.24 | 0.032   |
| FGF4     | Meta.  | 0.68        | 0.258   | YES                          | ND   | ND      |
| FLJ16124 | Meta.  | 0.80        | 0.275   |                              |      |         |
| FUCA1    | Meta.  | 1.29        | 0.166   | YES                          | 0.95 | 0.861   |
| GABPB2*  | Meta.  | 0.79        | 0.075   | YES                          | 1.57 | 0.046   |
| GNS      | Meta.  | 1.55        | 0.014   | YES                          | 0.86 | 0.739   |

|           |       |      |        |     |      |       |
|-----------|-------|------|--------|-----|------|-------|
| GAPDH     | Meta. | 1.85 | 0.002  | YES | 1.32 | 0.597 |
| GARS      | Meta. | 1.38 | 0.003  | YES | 1.47 | 0.130 |
| GAP43     | Meta. | 0.87 | 0.175  | YES | ND   | ND    |
| H2AFZ     | Meta. | 1.52 | 0.065  |     |      |       |
| HSPD1     | Meta. | 2.26 | <0.001 |     |      |       |
| HUWE1     | Meta. | 1.35 | <0.001 |     |      |       |
| HSPG2*    | Meta. | 2.41 | 0.001  | YES | 1.44 | 0.016 |
| HOXB7*    | Meta. | 1.55 | 0.117  | YES | 2.93 | 0.016 |
| HPRT1     | Meta. | 1.46 | 0.045  | YES | 1.00 | 0.736 |
| IRF2      | Meta. | 0.74 | 0.246  | YES | 1.07 | 0.803 |
| KRT6B     | Meta. | 0.70 | 0.365  |     |      |       |
| KIAA1128  | Meta. | 1.20 | 0.158  | YES | 1.04 | 0.470 |
| HLA-DQB1* | Meta. | 0.39 | 0.001  | YES | 0.59 | 0.191 |
| 3.8-1     | Meta. | 0.82 | 0.269  |     |      |       |
| MAPRE2    | Meta. | 1.72 | 0.189  | YES | 0.86 | 0.723 |
| MYOM2     | Meta. | 0.69 | 0.269  | YES | ND   | ND    |
| MYH10     | Meta. | 0.80 | 0.326  |     |      |       |
| PGAM1     | Meta. | 1.57 | 0.227  |     |      |       |
| PAICS     | Meta. | 1.36 | 0.082  | YES | 1.04 | 0.638 |
| POLR2C    | Meta. | 1.37 | 0.093  | YES | 1.03 | 0.495 |
| KCNJ12    | Meta. | 0.76 | 0.375  | YES | 0.88 | 0.226 |
| KCNA5     | Meta. | 1.25 | 0.368  | YES | 1.18 | 0.875 |
| PBXIP1    | Meta. | 1.32 | 0.197  | YES | 0.87 | 0.897 |
| PFN2      | Meta. | 1.98 | 0.037  | YES | 1.38 | 0.734 |
| RAFTLIN*  | Meta. | 1.52 | <0.001 | YES | 1.68 | 0.744 |
| SEPW1     | Meta. | 1.33 | 0.039  | YES | 1.34 | 0.434 |
| SERPINB5* | Meta. | 3.05 | 0.122  | YES | 3.22 | 0.010 |
| SIAH1     | Meta. | 1.36 | 0.006  |     |      |       |
| ST8SIA1   | Meta. | 0.97 | 0.927  | YES | 1.07 | 0.876 |
| TDGF1     | Meta. | 1.75 | 0.101  |     |      |       |
| TMSB4X    | Meta. | 1.03 | 0.696  |     |      |       |
| TLE2      | Meta. | 1.31 | 0.250  | YES | 0.81 | 0.692 |
| VIP       | Meta. | 0.91 | 0.770  | YES | ND   | ND    |
| CRK       | Meta. | 1.68 | 0.063  | YES | 1.20 | 0.799 |
| ZMAT2     | Meta. | 1.52 | 0.001  | YES | 1.05 | 0.760 |
| U60269    | Meta. | NO   | NO     |     |      |       |

**Legend to Supplemental Table 4.** The genes of the 80-gene model are shown with their gene name, and source (Liter., from literature; E1A, from the 28-gene biased signature; Meta., from meta-analysis of the reduced Michigan and Harvard datasets).

Analysis in the Duke cohort was performed on the available microarray datasets; in the IFOM training cohort, the analysis was performed by Real Time PCR (Q-PCR, see main text for details). Fold indicates the average fold increase or decrease in the poor prognosis group, compared to the good prognosis group (followed by its p-value). Genes upregulated or downregulated more than 1.5-fold are highlighted in red and blue, respectively. Asterisks indicate the 16 genes selected to develop the final prognostic model. ND, not detectable. NO, No probeset corresponding to the

hypothetical U60269 gene was present on the HU133 2.0 plus chip used in the Duke analysis.

**Supplemental Table 5. Multivariate analysis of the 10-gene prognostic model.**

| <b>A</b>        |               | <b>IFOM cohort<br/>(N=70)</b> |          | <b>Michigan cohort<br/>(N=67)</b> |          |
|-----------------|---------------|-------------------------------|----------|-----------------------------------|----------|
| <b>Variable</b> | <b>Subset</b> | <b>OD (95% CI)</b>            | <b>P</b> | <b>OD (95% CI)</b>                | <b>P</b> |
| Subtype         | Adenoca/BAC   | 0.38 (0.03-6.93)              | 0.478    | 2.89 (0.52-23.3)                  | 0.259    |
| Different.      | well+mod/poor | 1.16 (0.19-6.89)              | 0.871    | 0.58 (0.12-2.89)                  | 0.499    |
| 10-gene         | poor/good     | 8.34 (2.83-27.6)              | *0.0002  | 3.03 (1.14-8.62)                  | *0.030   |
| <b>B</b>        |               | <b>IFOM cohort<br/>(N=47)</b> |          | <b>Michigan cohort<br/>(N=38)</b> |          |
| <b>Variable</b> | <b>Subset</b> | <b>OD (95% CI)</b>            | <b>P</b> | <b>OD (95% CI)</b>                | <b>P</b> |
| Subtype         | Adenoca/BAC   | 0.18 (0.01-2.32)              | 0.184    | unstable                          | 0.948    |
| Different.      | well/poor     | 0.58 (0.12-2.32)              | 0.474    | unstable                          | 0.945    |
| 10-gene         | poor/good     | 11.98 (3.01-60.0)             | *0.001   | 4.81 (ND-ND)                      | 0.093    |

**Legend to Supplemental Table 5. A.** The 10-gene model was tested for prediction of survival in the indicated cohorts of patients, in comparison to other biological parameters. Data are expressed as odds ratio (OD) at 95% confidence interval (95% CI). Asterisks indicate statistically significant values. BAC means bronchioalveolar cell carcinoma. In the Harvard and Duke cohorts, analysis was not performed because of the facts that either the number of BAC was too low (only three in Harvard cohort) or the biological information was unavailable (for the Duke cohort). **B.** We repeated the analysis excluding patients with moderately differentiated tumors. In the Michigan cohort the multivariate model resulted to be unstable because of the unbalanced number of patients with poor prognosis (5 patients) compared to good prognosis (33 patients). ND. Confidence intervals were not calculated because of model instability.

**Supplemental Table 6. Multivariate analysis of 10-gene prognostic marker in the Duke cohort.**

| Variable      | Subset      | Duke cohort        |        |
|---------------|-------------|--------------------|--------|
|               |             | OD (95% CI)        | P      |
| Sex           | male/female | 1.57 (0.26 - 10.4) | 0.618  |
| Age           | ≥64/<64     | 2.05 (0.30 - 19.6) | 0.482  |
| Stage         | IB/IA       | 1.48 (0.21 - 9.95) | 0.684  |
| 10-gene model | poor/good   | 11.5 (1.94 - 104)  | *0.013 |

**Legend to supplemental Table 6.** In the Duke cohort a large fraction of tumors are stage IA adenocarcinoma, thus to test whether the 10-gene model was an independent prognostic factor also in this cohort of patients, multivariate analysis was performed. Data are expressed as odds ratio (OD) at 95% confidence interval (95% CI). Asterisks indicate statistically significant values. Four patients were excluded from the analysis because the stage (IA or IB) was not defined in the original dataset (Patients: 00-0479, 00-909, 00-1082, 00-0941).

**A**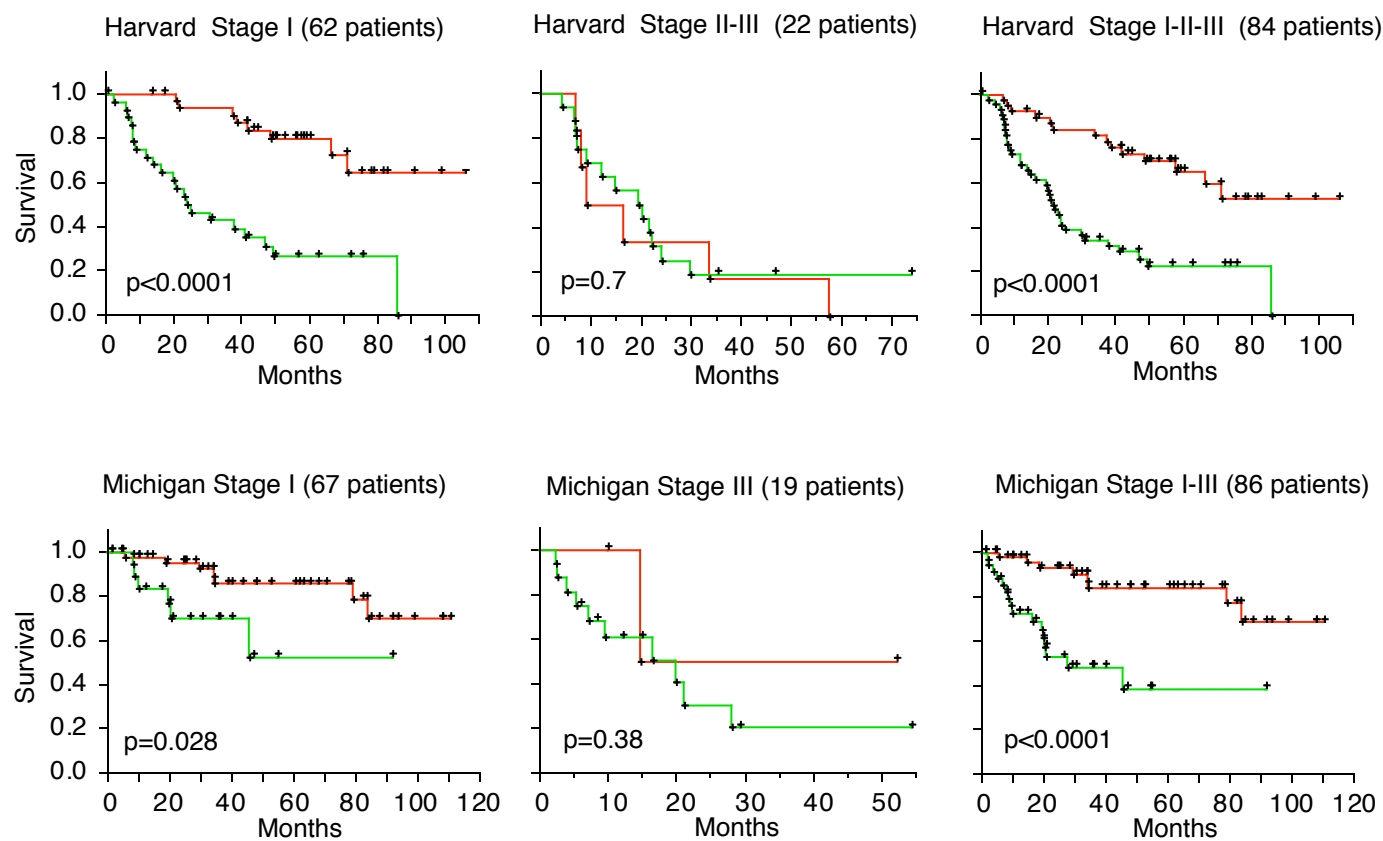**B**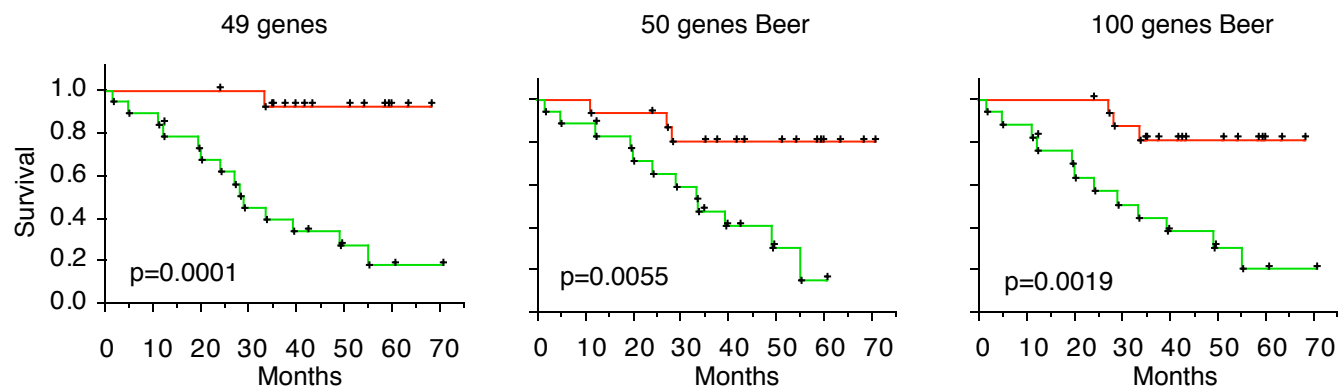

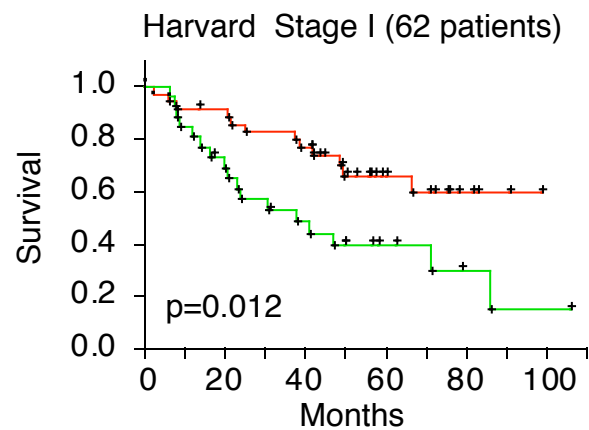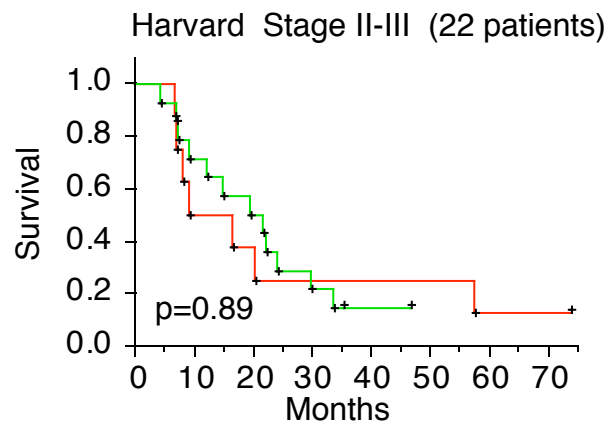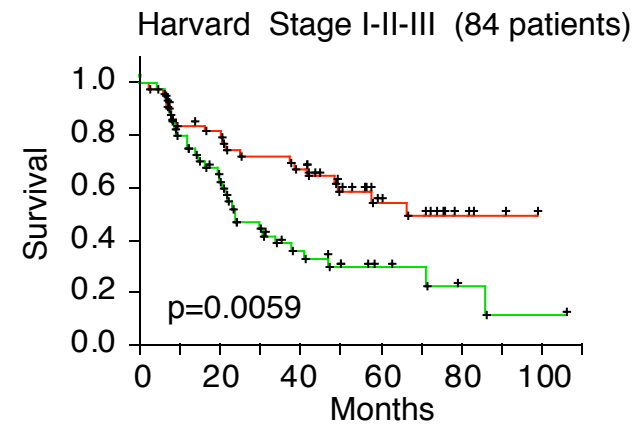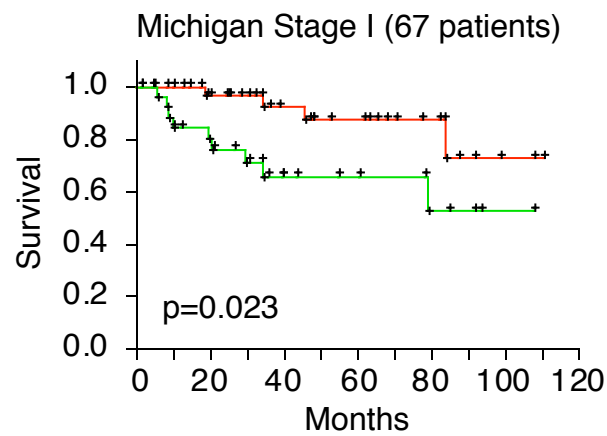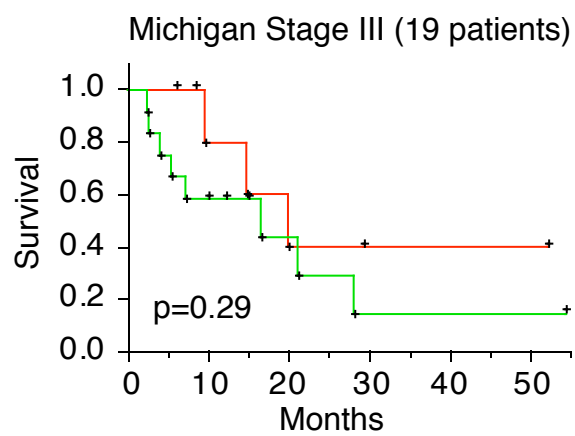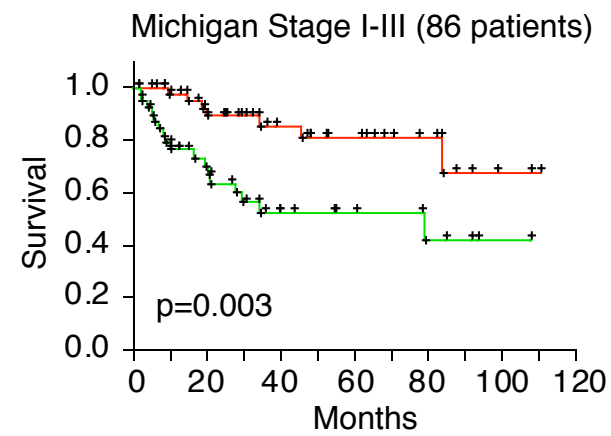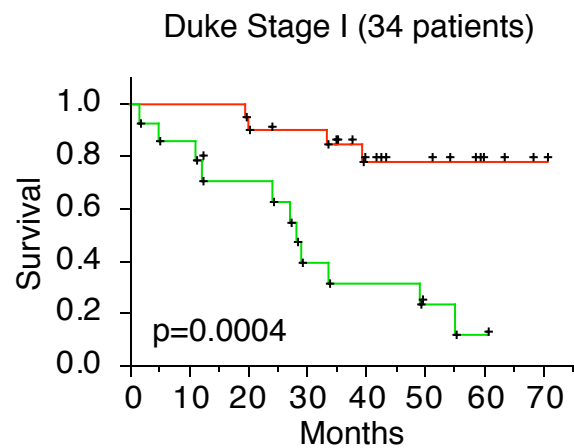

**A**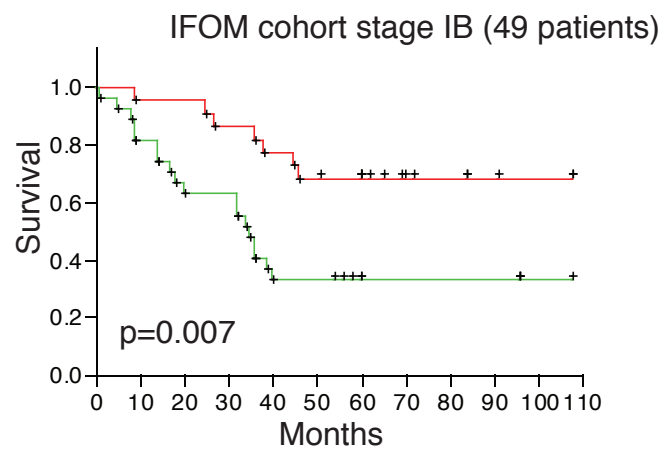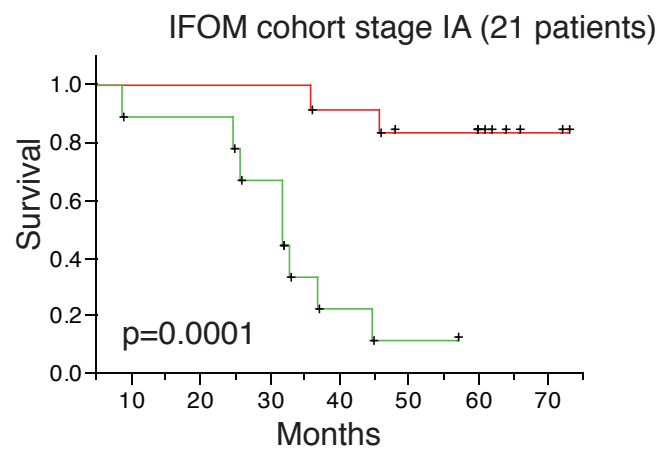**B**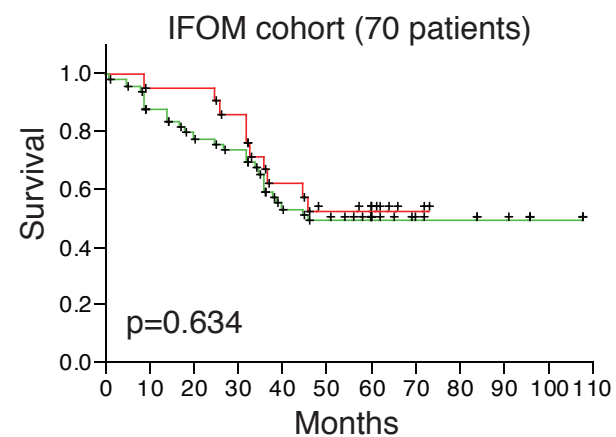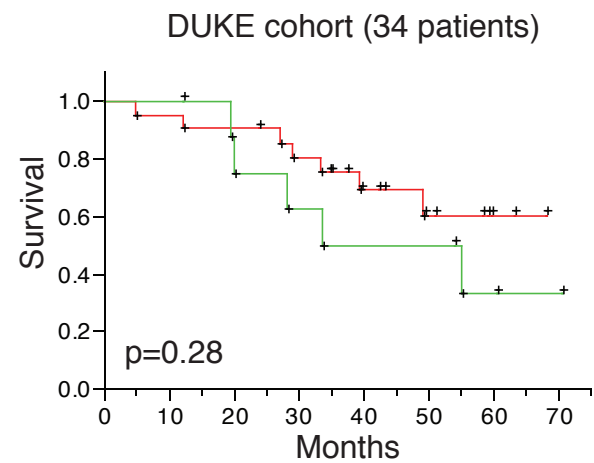

Supplement: sd1 [file 1]
